# Supplementary material for: Similar excitability through different sodium channels and implications for the analgesic efficacy of selective drugs
Source: eLife. 2024 Apr 30;12:RP90960. doi: 10.7554/eLife.90960 (PMC11060714; doi:10.7554/eLife.90960)
Supplement: Figure 2—source data 1. [file elife-90960-fig2-data1.xlsx]

## Sheet: panel A
		DIV0
Holding potential (mV)		-44.8	-39.8	-34.8	-29.8	-24.8	-19.8	-14.8	-9.8	-4.8	0.2	5.2	10.2	15.2
Current density (pA/pF)	Baseline	-1.82	-6.95	-15	-23.1	-33.8	-36.9	-44.1	-51.1	-61.4	-69.8	-73.4	-70.4	-63.5
		0	0	-4.59	-9.23	-15.9	-20.2	-23	-32.2	-43	-55.4	-61.5	-62.8	-60.1
		0	0	-2.67	-7.44	-12.2	-18.7	-23.2	-29.3	-35.3	-41.9	-48.8	-53.5	-52.2
		0	-1.43	-5.71	-10.1	-14.8	-21.1	-46.4	-67.4	-73.2	-70.1	-65.4	-56.6	-46.6
		0	-4.74	-18	-38.8	-69.1	-99.9	-122	-135	-145	-144	-139	-129	-116
		-9	-17.2	-26.6	-30.6	-36.1	-39.1	-37.8	-33.9	-29.2	-25.3	-17.6	-12	-6
		-3.64	-9.64	-21.1	-29.9	-38.3	-45.4	-50.6	-55.9	-62.9	-68.6	-66.9	-59	-50.1
	PF-24	-1.82	-5.91	-11.7	-15.8	-19.9	-20.2	-30.4	-39	-44.5	-44.7	-41	-36.9	-30.9
		0	0	0	0	-1.82	-7.41	-20.3	-29.7	-32.7	-32.3	-27.9	-20.8	-18.4
		0	0	0	-4.67	-9.67	-12.7	-17.8	-20.8	-22.8	-26.5	-29.5	-26.2	-24.5
		0	0	-12.6	-12.4	-13.6	-22.3	-22.3	-30.9	-28.4	-26	-26.4	-24.7	-19.3
		0	-7.11	-31.7	-46.8	-66.3	-69.6	-63.4	-52.5	-42.1	-21.8	0	0	0
		-8.89	-17	-19.2	-22.3	-23.6	-21.7	-18.9	-16.1	-12.6	-8.5	-3.17	0	0
		0	-3.57	-7.93	-11	-11.9	-14.1	-15	-14.1	-15	-15.4	-12.8	-10.1	-6.14

## Sheet: panel B
DIV0				DIV0
Firing pattern				Baseline								PF-24
Baseline	PF-24		Stim intensity	1.0R	1.5R	2.0R	2.5R	3.0R	3.5R	4.0R		1.0R	1.5R	2.0R	2.5R	3.0R	3.5R	4.0R
Repetitive	Transient		Firing rate (spk/s)	1	1.5	2	4	3	4.5	5		1	1	1	1	1	1	1
Repetitive	Transient			1	1	1.5	2.5	3.5	2	5.5		1	1	1	1	1	1	1
Repetitive	Transient			1	2	2.5	2.5	3	3	3.5		1	1	1	1	1	1	1
Transient	Transient			1	1	1	1	1	1	1		1	1	1	1	1	1	1
Repetitive	Transient			1	2	2	3	3	4	4		1	1	1	1	1	1	1
Repetitive	Repetitive			1	2	2	3	3	4	4		1	3	3	3	4	5	5
Transient	Transient			1	1	1	1	2	1.7	1		1	1	1	1	1	1	1
Transient	Transient			1	1	1	1	1	1	1		1	1	1	1	1	1	1
Transient	Transient			1	1	1	1	1	1	1		1	1	1	1	1	1	1
Repetitive	Transient			1	1.5	2	2	2	1.5	3		1	1	1	2	1	2	2
Repetitive	Transient			1	2	2.5	3	4	4.5	4.5		1	1	1	1	1	1	1
Transient	Transient			1	1.5	1.5	2	1.5	2.5	2		1	1	1	1	1	1	1
Transient	Transient			1	1	1.5	2	1	1.5	2		1	1	1	1	1	1	1
Transient	Transient			1	1	1	1	1	1	1		1	1	1	1	1	1	1
Repetitive	Transient			1	1.5	1.5	2	1.5	2	3		1	1	1	1	1	1	1
Transient	Transient			1	1	1	1	1	1	1		1	1	1	1	1	1	1
			Only data from cells firing repetitively at baseline are included in firing rate plot

## Sheet: panel C
DIV0			DIV0			DIV0
Rheobase (pA/pF)			Spike height (mV)			Resting mem. pot. (mV)
Baseline	PF-24		Baseline	PF-24		Baseline	PF-24
0.847	2.985		84.7	30.5		-62	-70
0.568	3.529		78.75	28		-54	-57
1.416	4.237		82.25	73		-76.5	-98
0.915	1.697		76.7	36		-55	-63
0.124	3.65		92	54		-65.5	-60
0.109	0.109		87	83		-64	-59
1.013	2.014		72.7	70		-53	-53
2.914	2.471		71	72		-59	-58
0.84	1.21		82	86		-81	-79
2.688	2.541		73.5	69		-68	-55
1.449	1.25		80.5	78		-59.5	-52
6.988	7.735		75	74		-70	-65
1.739	2.703		84	73		-57	-53
2.857	6.19		77.5	69		-64	-65
3.706	3.929		70.5	66		-67.5	-58
2.69	2.809		67	51		-60	-61

## Sheet: Fig2-Sup1
		DIV0
Holding potential (mV)		-44.8	-39.8	-34.8	-29.8	-24.8	-19.8	-14.8	-9.8	-4.8	0.2	5.2	10.2	15.2
Current density (pA/pF)	Baseline	0	0	0	0	0	-4.25	-13.5	-45.2	-57.6	-53.3	-45.6	-38.1	-29.9
		-6.13	-40.9	-213	-253	-255	-248	-235	-217	-195	-177	-155	-132	-112
		0	0	-11.2	-32.1	-61.1	-91.7	-118	-133	-144	-144	-142	-133	-118
		0	0	-2.18	-3.82	-7.82	-23.8	-67.4	-73.9	-75.9	-71.2	-64.9	-58.4	-49.6
		0	-1	-8.27	-18.1	-27.8	-34.1	-40	-41.1	-41.5	-43.3	-43.3	-39.1	-34.2
		0	0	0	0	-2.33	-4.75	-10.1	-19.8	-38.4	-65.2	-76.8	-82.5	-82.2
		0	-1.65	-5.9	-12.5	-16.9	-25.5	-32.5	-42	-56	-69	-76	-75	-71.5
		-1	-7.14	-18.6	-30.5	-36.9	-50.6	-55.5	-58.8	-59.3	-60.1	-56.8	-52.4	-46.1
	A-803467	0	0	0	0	0	-5.19	-25.3	-31.1	-31	-29.3	-26.2	-22.4	-16.4
		0	0	-124	-117	-109	-100	-90.6	-83.1	-75.1	-66.1	-58.1	-48.7	-41.7
		-2.06	-10.6	-27.5	-49.7	-60.6	-57.1	-54.4	-50.6	-48.6	-38.6	-34.3	-19.2	-6.89
		0	0	0	-0.82	-4.06	-9.53	-17.4	-22.6	-25.6	-26.5	-24.4	-22.6	-18.5
		0	0	0	0	0	0	-0.93	-3.73	-6.4	-6.4	-6.4	-5.6	-1.47
		0	0	0	0	-2.5	-5	-10	-18.8	-30.8	-39.2	-47.7	-48.1	-48
		0	0	-2	-2.9	-5.3	-6.3	-9.3	-14.5	-19	-23.3	-26.3	-25.4	-23.1
		0	-1.43	-6.14	-13.2	-18.1	-23.2	-23.5	-23.5	-25.5	-23.5	-23.2	-22.2	-19.6

## Sheet: Fig2-Sup2
DIV4-7				DIV4-7																DIV4-7			DIV4-7
Firing pattern				Baseline								PF-24								Rheobase (pA/pF)			Spike height (mV)
Baseline	PF-24		Stim intensity	1.0R	1.5R	2.0R	2.5R	3.0R	3.5R	4.0R		1.0R	1.5R	2.0R	2.5R	3.0R	3.5R	4.0R		Baseline	PF-24		Baseline	PF-24
Repetitive	Repetitive		Firing rate (spk/s)	1	6	8.5	10.5	10.5	11	10		1	2	6	5	5	4	4		0.654008	0.520607		74.75	59.7
Transient	Transient			1	2	2	1.5	1.5	1	1		1	1	1	1	1	1	1		2.69841	2.44565		57.35	36
Repetitive	Repetitive			1	3	5.5	7.5	7	5	4		1	1	4	4	4	2	2		0.619835	0.639098		70	65
Repetitive	Transient			1	1.5	2.5	3.5	4	1	1		1	1	2	2	1	1	1		11.2174	11.4286		46	38
Repetitive	Repetitive			1	2	7	6.5	7	6.5	8		1	1	2	3	2	3	2		0.869565	1.15044		64.5	56
Repetitive	Repetitive			1	2	5.5	7.5	11	13	14.5		1	1	5	9	13	13	13		0.748792	1.10429		84	82
Repetitive	Repetitive			1	1.5	4	4.5	5.5	5	7.5		1	1	2	6	7	12	7		0.466321	0.365854		96	92
Repetitive	Repetitive			1	1	7	8.5	9.5	10	7.5		1	1	1	2	3	4	3		1.5	0.944882		73.5	64
Repetitive	Repetitive			1	4.5	9	12.5	13.5	18	20		1	6	5	12	13	17	17		0.250836	0.228137		93	95
Repetitive	Repetitive			1	6.5	12	14.5	13	11	8		1	3	3	3	3	3	2		1.125	1.08333		54	65
Repetitive	Repetitive			1	8	11	14.5	14	12	9		1	1	2	12	14	15	13		1.76	0.96		72.5	62
Transient	Transient			1	1	1	1	1	1	1		1	1	1	1	1	1	1		2.92683	3.34928		75	70
Transient	Transient			1	1	1	1	1	1	1		1	1	1	1	1	1	1		8.5	8.93617		75	68
			Only data from cells firing repetitively at baseline are included in firing rate plot
