# Supplementary material for: Similar excitability through different sodium channels and implications for the analgesic efficacy of selective drugs
Source: eLife. 2024 Apr 30;12:RP90960. doi: 10.7554/eLife.90960 (PMC11060714; doi:10.7554/eLife.90960)
Supplement: Figure 3—source data 1. [file elife-90960-fig3-data1.xlsx]

## Sheet: panel A
		DIV4-7
Holding potential (mV)		-44.8	-39.8	-34.8	-29.8	-24.8	-19.8	-14.8	-9.8	-4.8	0.2	5.2	10.2	15.2
Current density (pA/pF)	Baseline	0	0	0	-0.91	-10.4	-15.6	-15.8	-15.8	-13.6	-10.9	-7.57	-4.06	-0.84
		0	-2.17	-17.4	-22.8	-23.6	-22.8	-20.6	-18	-15.7	-12.6	-9.3	-6.28	-3.43
		-7.91	-21.8	-52.5	-76.5	-84.5	-83.4	-79.8	-74.3	-63.9	-54.6	-45.2	-35.6	-26.7
		0	-1.83	-13.9	-54.4	-95.7	-109	-106	-96.4	-84.8	-70.5	-55.2	-41.7	-28.1
		0	0	-15.9	-20.8	-30.4	-41.3	-47.6	-49.5	-49.1	-45.6	-40.4	-31.9	-26
		0	-1.19	-9.56	-31.3	-53.2	-61.1	-62	-60.4	-55.5	-49.5	-44.8	-38.7	-33.1
		0	0	4.629	-25.6	-39.9	-44.5	-44.5	-42.7	-39.1	-34.2	-28.8	-23.2	-17.7
		0	0	-38.8	-63	-78.9	-85.7	-84.2	-78.3	-69.2	-59.9	-51	-41	-31.8
		0	-20	-37.1	-38.3	-36.1	-33.4	-29.8	-26.3	-22.3	-18.1	-14.3	-10.4	-10.4
	PF-71	0	0	-3.38	-7.88	-8.58	-7.78	-6.69	-5.19	-3.26	-1.48	0.195	2.442	3.597
		0	-1.11	-6.66	-9.06	-10.2	-9.6	-8.13	-6.64	-4.83	-2.98	-1.36	0	0
		-2.45	-15.5	-28.2	-33.4	-31.7	-29.1	-26	-24.6	-16.4	-11.8	-6.88	-2.06	0
		0	-17.2	-56.7	-80.5	-82.2	-76.7	-69.4	-57.2	-46.7	-35.6	-24.4	-13.3	-12.8
		0	0	-3.7	-14.7	-21.6	-26.5	-26.8	-23.7	-21.6	-17	-12.3	-7.4	-2.15
		0	-2.58	-20.5	-31.2	-33.2	-29.7	-28.9	-25.6	-22.9	-19.3	-16.1	-12.9	-9.75
		0	0	-11.3	-23.4	-26.6	-27.8	-26	-23.4	-20.6	-17.3	-13.7	-10.1	-6.86
		0	0	-39.4	-45	-44.8	-40	-35.7	-29.4	-24	-17.8	-11.9	-5.96	0
		0	-21.7	-22.4	-21.2	-19.5	-17.5	-15.3	-13.2	-11.1	-8.84	-6.73	-4.59	-2.5
	PF-71+ICA	0	0	-0.94	-1.81	-1.96	-1.58	-0.94	-0.36	0	0	0	0	0
		0	0	-1.79	-3.77	-3.98	-3.96	-3.06	-1.94	-0.94	0	0	0	0
		-1.03	-5.55	-10.4	-14.4	-14.4	-13.5	-11.9	-9.42	-7.12	-4	-2.09	0	0
		0	0	-1.65	-13.3	-48.9	-68.3	-72.2	-67.2	-60.5	-50.5	-42.2	-29.4	-20.6
		0	0	-1.4	-11.8	-13.5	-14.4	-14.1	-12.4	-11.2	-7.75	-4.3	-0.55	0
		0	-1.19	-7.17	-12.9	-14.6	-14.1	-13.4	-12.2	-10	-7.9	-5.98	-4.31	0
		0	0	-4.46	-10.5	-14.1	-13.8	-12.8	-10.8	-9.01	-6.07	-3.11	-0.49	0
		0	0	-12	-12.5	-9.71	-7.56	-6.93	-2.51	0	0	0	0	0
		0	-3.26	-7.76	-8.01	-7.25	-6.53	-5.26	-4.18	-2.75	-1.33	-0.19	0	0

## Sheet: panel B
DIV4-7				DIV4-7
Firing pattern				Baseline								PF-71
Baseline	PF-71		Stim intensity	1.0R	1.5R	2.0R	2.5R	3.0R	3.5R	4.0R		1.0R	1.5R	2.0R	2.5R	3.0R	3.5R	4.0R
Repetitive	Transient		Firing rate (spk/s)	1	4.5	6.5	10	11	11	12.5		1	1.3	1	1.7	1	1	1
Repetitive	Repetitive			1	3.3	7	8.3	7.7	9	7.3		1	3	5	4	2.5	3.5	3
Repetitive	Repetitive			1	5	7.5	9.5	11	12	13		1	4.3	5.7	5.7	4	4	2.7
Repetitive	Transient			1	1.7	3.3	4.3	5	5	4.3		1	1	1	1	1	1	1
Transient	Transient			1	1	1	1.7	2	1.7	2.3		1	1	1	1	1	1	1
Repetitive	Transient			1	2	6	9	7	10	6		1	1	1	1	1	1	1.3
Repetitive	Transient			1	2.3	4.7	6.7	6.7	7.7	6		1	1	2.3	1.7	1.7	1.7	1.4
Repetitive	Repetitive			1	7.7	14.3	19.7	19.3	16.3	11		1	5	6	4.7	5.3	4	4
Repetitive	Transient			1	1.7	4.3	10	11.3	11.7	9.7		1	1	1	1	1	1	1
Transient	Transient			1	1	1	1	1	1	1		1	1	1	1	1	1	1
Transient	Transient			1	1	1	1	1	1	1		1	1	1	1	1	1	1
Transient	Transient			1	1	1	1.5	2.5	2.5	1		1	1	1	1	1	1	1
Transient	Transient			1	1.5	2.5	2	2	2	1.5		1	1	1	1	1	1	1
Transient	Transient			1	2	2.3	2	2.7	2.3	1.7		1	1	1	1	1	1	1
Repetitive	Transient			1	1	2	2.7	3.3	3.3	3.3		1	1	1	1	1	1	1
Repetitive	Repetitive			1	5	9.5	12.5	14	14.5	12.5		1	5	8.7	9.7	9.7	7.7	6.3
			Only data from cells firing repetitively at baseline are included in firing rate plot
Firing pattern				Baseline								PF-71
Baseline	ICA		Stim intensity	1.0R	1.5R	2.0R	2.5R	3.0R	3.5R	4.0R		1.0R	1.5R	2.0R	2.5R	3.0R	3.5R	4.0R
Repetitive	Repetitive		Firing rate (spk/s)	1	1	3	2	4	3	6		1	2	3	4	1	1	1
Repetitive	Repetitive			1	6	9.5	10.5	10	11	11.5		1	3	4	6	5	5	5
Repetitive	Transient			1	2.5	4	3.5	2.5	2	2		1	2	2	1	1	1	1
Transient	Transient			1	1	1	2	2	2	2		1	1	1	1	1	1	1
Repetitive	Transient			1	3.5	8	9	7	8	7.5		1	1	1	1	2	2	2
Repetitive	Transient			1	2	3.5	2.5	2.5	2.5	2.5		1	1	1	1	1	1	1
Repetitive	Repetitive			1	5.5	12	13	14.5	17	16		1	9	13	12	12	9	8
Repetitive	Transient			1	3	6	10	11	11	9.5		1	1	1	1	1	1	1
Repetitive	Transient			1	1.5	3	5.5	6	5	4		1	1	1	2	2	2	1
Repetitive	Transient			1	5.5	7.5	9.5	10.5	11	7.5		1	1	1	1	1	1	1
Transient	Transient			1	1	1.5	1.5	1.5	1	1		1	1	1	1	1	1	1
Transient	Transient			1	1	1	1	1	1	1		1	1	1	1	1	1	1
Repetitive	Repetitive			1	4.5	6.5	9.5	11.5	13	15.5		1	1	2	3	3	4	4
Repetitive	Transient			1	3	4.5	3.5	3.5	3	2.5		1	1	1	1	1	1	1
Transient	Transient			1	1	2	2	2	2	2		1	1	2	1	2	2	2
Transient	Transient			1	1	1	1	1	1	1		1	1	1	1	1	1	1
Repetitive	Transient			1	7	10	12	12	11	7.5		1	2	2	2	2	2	2
Repetitive	Repetitive			1	8.5	9.5	9.5	9	7.5	6.5		1	2	3	3	3	3	2
Repetitive	Transient			1	1	1.5	2	3.5	2	2		1	1	1	1	1	1	1
			Only data from cells firing repetitively at baseline are included in firing rate plot

## Sheet: panel C
DIV4-7			DIV4-7			DIV4-7			DIV4-7			DIV4-7			DIV4-7
Rheobase (pA/pF)			Rheobase (pA/pF)			Spike height (mV)			Spike height (mV)			Resting mem. pot. (mV)			Resting mem. pot. (mV)
Baseline	PF-71		Baseline	ICA		Baseline	PF-71		Baseline	ICA		Baseline	PF-71		Baseline	ICA
0.968	2.083		5.455	5.143		77.5	68		56	73		-81	-82.3		-68	-68
1.925	2.292		0.752	0.849		74.7	55		87	79		-70	-75		-51	-50
0.233	0.435		1.599	1.174		48	23.7		54	59		-91	-96		-64	-63
1.271	2.979		2.305	2.358		76	34		70	52		-72	-70		-57	-61
1.064	1.47		2.462	2.147		82	28.3		80.5	71		-74	-73		-50	-50
1.067	1.167		0.806	0.789		88	56.3		57.5	33		-86	-88		-60	-59
0.364	0.363		1.205	1.321		75.3	44.8		84	88		-75	-72		-53	-54
0.973	1.343		0.914	0.965		56	49		86	71		-53	-54		-62	-62
0.934	2.927		0.688	0.675		64	17		72.5	64		-56	-56		-63	-60
1.078	2.888		1.679	2.109		57.5	19.7		61.5	53		-70	-68		-73	-73
2.941	3.204		4.91	6.971		65.5	44		59.5	45		-53	-58		-71	-67
2.5	4.839		1.362	0.891		68	26.7		60	50		-65	-67		-61	-59
0.47	1.803		1.6	1.914		55	31.7		77.5	80		-55.5	-55		-72	-71
0.859	1.053		1.557	1.216		62.3	42		73.5	63		-66	-68		-59	-55
3.062	3.333		4.505	5.157		83	63		49.5	44		-65	-69		-63	-63
0.906	1.077		2.922	3.185		69	58.7		70	62		-75	-74		-67	-65
			1	1.97					68.5	63					-59	-65
			2.413	2.869					85.5	83					-60	-58
			1.044	1.144					76.5	65					-67	-65

## Sheet: Fig3-Sup1
DIV0				DIV0																DIV0			DIV0
Firing pattern				Baseline								PF-71								Rheobase (pA/pF)			Spike height (mV)
Baseline	PF-71		Stim intensity	1.0R	1.5R	2.0R	2.5R	3.0R	3.5R	4.0R		1.0R	1.5R	2.0R	2.5R	3.0R	3.5R	4.0R		Baseline	PF-71		Baseline	PF-71
Repetitive	Repetitive		Firing rate (spk/s)	1	2	2	3	3	4	4		1	2	2	5	8	4	7		0.123675	0.362319		92	81
Repetitive	Repetitive			1	2	2	3	3	4	4		1	2	2	4	2	4	3		0.108696	0.106952		87	77
Transient	Transient			1	1	1	1.5	1	1	1		1	1	1	1	1	1	1		6.82432	6.2585		69.3	76
Transient	Repetitive			1	1	1	1	1	1	1		1	2	1	2	1	3	3		1.6568	1.93103		68.4	55
Repetitive	Repetitive			1	2.5	3	5	5.5	7	7		1	2	4.5	3	7.5	7.5	7		0.375	0.434783		88	72.5
Repetitive	Repetitive			1	1.5	2	2.5	3	2.5	2.5		1	1	2	3	2	3	4		0.299401	0.422535		75	65
Repetitive	Repetitive			1	2.5	3	3	3	3.5	4		1	2	3	5	5	7	8		0.306122	0.444444		96.5	95
Transient	Transient			1	1	1	1	1	1	1		1	1	1	1	1	1	1		0.794702	1.71779		85	75
Transient	Transient			1	1	2	2.5	2.5	2.5	2		1	1	1	1	1	1	1		2.7451	2.06897		62	49
Repetitive	Repetitive			1	1.5	2	2.5	3.5	4.5	5		1	2	3	4	6	7	9		0.304878	0.372671		89	86
			Only data from cells firing repetitively at baseline are included in firing rate plot
