# Supplementary material for: Similar excitability through different sodium channels and implications for the analgesic efficacy of selective drugs
Source: eLife. 2024 Apr 30;12:RP90960. doi: 10.7554/eLife.90960 (PMC11060714; doi:10.7554/eLife.90960)
Supplement: Figure 5—source data 1. [file elife-90960-fig5-data1.xlsx]

## Sheet: panel E
Delta threshold (mV)			Delta overshoot (mV)			Delta rise time (ms)
DIV0	DIV4-7		DIV0	DIV4-7		DIV0	DIV4-7
10	16		0	-11		0.2	0.7
3	20		-1	-8		0	1.1
4	14		0	-10		0.2	2.5
20	27		-2	-10		-0.5	1.1
4	13		-5	-16		-0.2	1.5
0	11		-3	-10		0	1.4
0	11		-1	-14		0.2	0.8
1	26		1	-18		-0.1	0.8
6			-3			0.4

## Sheet: Fig5-Sup2
DIV0
Voltage threshold (mV)
Baseline	TTX
-33	-30.5
-41.9	-27.5
-30.9	-30
-30	-33
-39.3	-37.2
-43	-41
-40.5	-37
-42.5	-54
-42	-30.7
-31.5	-26
-41.9	-23.8
-29	2
-29	-25
-34	-32
-32.5	-34
-35	-35
-49	-35
-30	-29
-22	-23
-22.5	-22
-36.5	-25
-29	-15
-25	-18
-29	-23
-24	-23
