# Supplementary material for: Similar excitability through different sodium channels and implications for the analgesic efficacy of selective drugs
Source: eLife. 2024 Apr 30;12:RP90960. doi: 10.7554/eLife.90960 (PMC11060714; doi:10.7554/eLife.90960)
Supplement: Figure 8—source data 1. [file elife-90960-fig8-data1.xlsx]

## Sheet: panel A
	Withdrawal latency (sec) to radiant heat
Days from CFA inj.	-2	-1	0	1	2	3	+PF-71
Control	12.27	11.4	10.37	11.9	8.8	8.23	12.57
	8.7	10.33	10.3	12.8	9.17	9.57	7.53
	10.6	10.27	6.97	7.93	11.57	12.6	11.8
	8.2	8.77	6.87	7.3	11.2	9.47	7.2
	11.77	10.73	10.4	11.47	10.7	9.8	13.03
	10.6	8.1	9.5	8.77	10.67	11.37	9.9
CFA	5.9	7.9	9.57	1.97	2.5	3.63	9.5
	12.57	6	8.53	6.7	3.33	2.67	5.8
	11.1	14.03	10.73	1.53	3.57	0.87	9.17
	10.6	10.47	9.03	1.6	0.9	1.77	9.93
	11.67	9.4	9.4	1.97	2.33	2.7	6.5
	11.13	10.5	10.63	3.3	6.17	6.23	10.77
	9.6	7.7	10.4	1.73	2.77	4.73	9.37
	11.13	12.9	8.43	4.7	4.07	4.33	10.9
	12.57	11.33	10.57	6.13	7.03	7.07	9.2

## Sheet: panel B
	Withdrawal threshold (g) to von Frey filaments
Days from CFA inj.	-1	0	1	2	3	+PF-71
Control	0.6	0.6	0.6	1	0.6	0.6
	1	0.6	0.6	1	0.6	0.6
	1	1	0.6	1	1	1
	1	0.6	0.6	1	1	1
	0.6	0.6	0.6	0.6	0.6	0.6
	0.4	0.6	1	0.6	1	0.4
CFA	1	0.6	0.4	0.16	0.07	0.4
	0.4	0.6	0.4	0.16	0.16	0.6
	0.6	1	0.07	0.02	0.04	0.16
	1	1	0.16	0.07	0.02	0.02
	1	1	0.02	0.07	0.02	0.04
	0.6	0.6	0.4	0.07	0.4	0.6
	0.6	0.6	0.16	0.07	0.16	0.4
	0.6	1	0.07	0.07	0.16	0.4
	0.6	1	0.4	0.16	0.16	0.4
